# Supplementary material for: BRCA2 Regulates Transcription Elongation by RNA Polymerase II to Prevent R-Loop Accumulation
Source: PubMed Central journal article supplement (PMC5846855; doi:10.1016/j.celrep.2017.12.086), 2018-01-28
Supplement: mmc1.pdf [file mmc1.pdf]

**Cell Reports, Volume 22**

**Supplemental Information**

**BRCA2 Regulates Transcription Elongation by  
RNA Polymerase II to Prevent R-Loop Accumulation**

**Mahmud K.K. Shivji, Xavier Renaudin, Çiğdem H. Williams, and Ashok R. Venkitaraman**

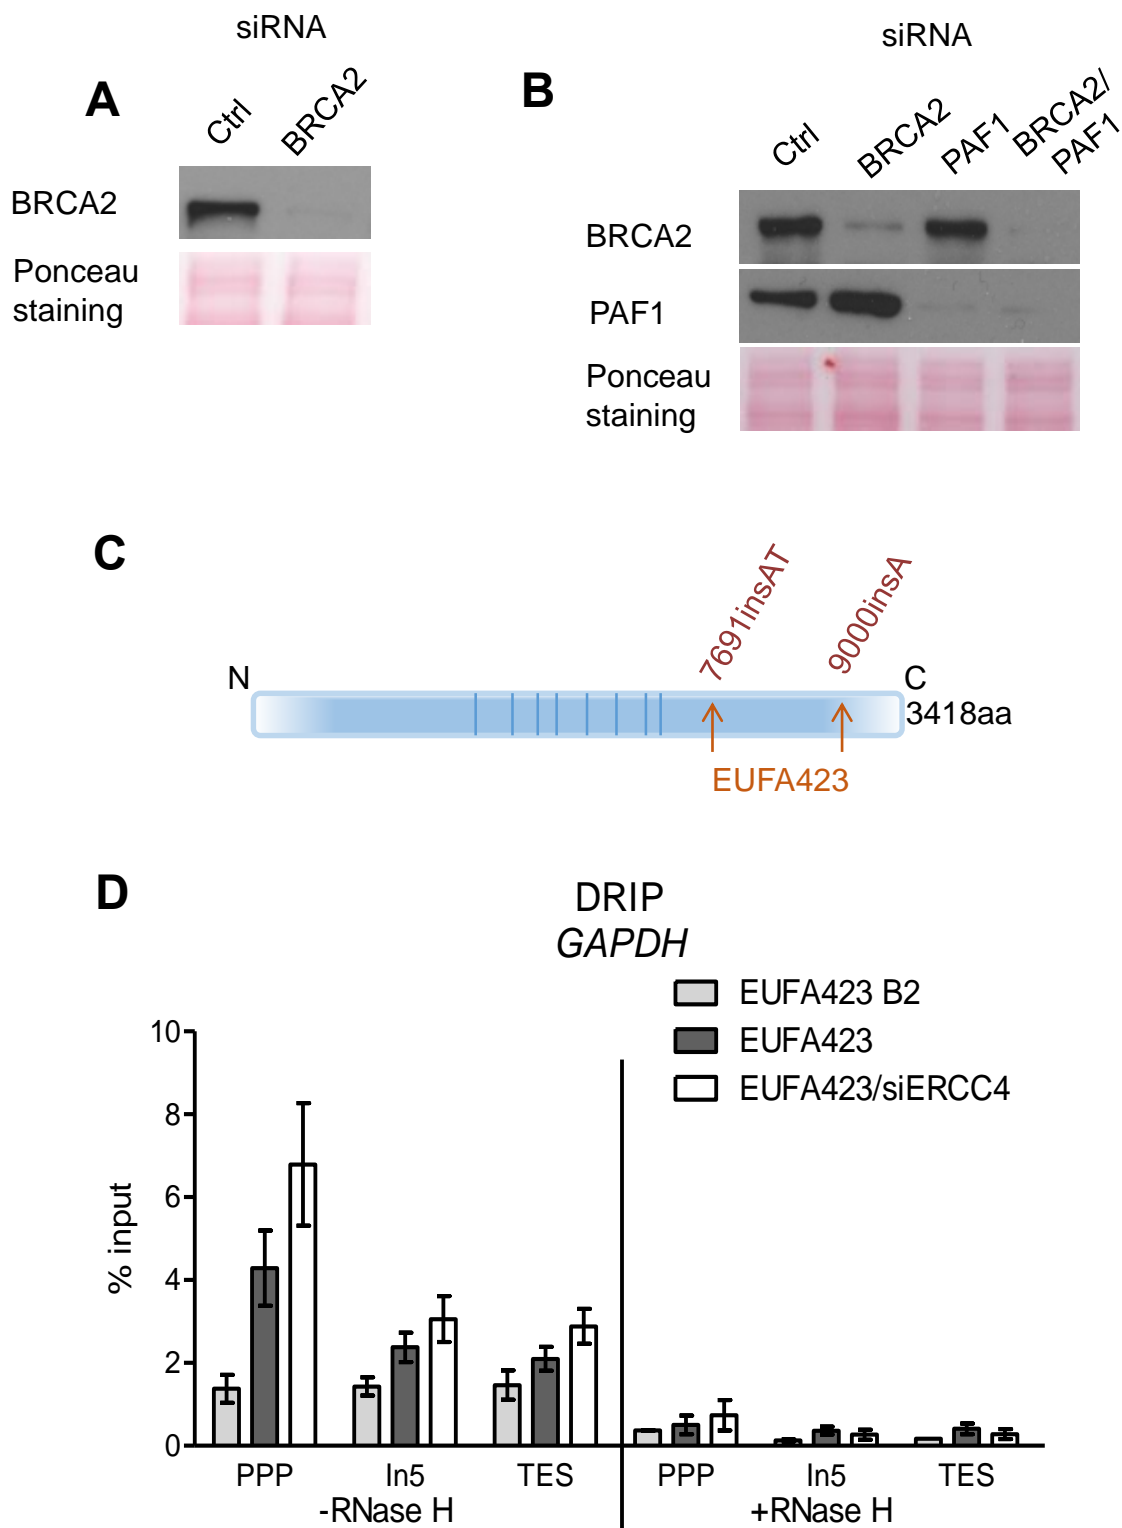

**Figure S1. Related to Figures 1, 2 and 6.**

(A)(B) Western blots for BRCA2 or PAF1 in HeLa Kyoto cells treated with the indicated siRNAs. (C) Schematic showing the location in the 3418aa human BRCA2 protein of the truncating mutations *BRCA2*<sup>7691insAT</sup> and *BRCA2*<sup>9000insA</sup> present in patient-derived EUFA423 cells. EUFA423 B2 control cells have been reconstituted with full-length wild-type BRCA2. (D) DRIP analyses with S9.6 antibody of the *GAPDH* gene in EUFA423 B2 and EUFA423 cells, without or with siRNA targeting ERCC4. R-loop digestion by RNase H enzyme is shown as a control. Plots show the mean $\pm$ s.e.m from two independent experiments.

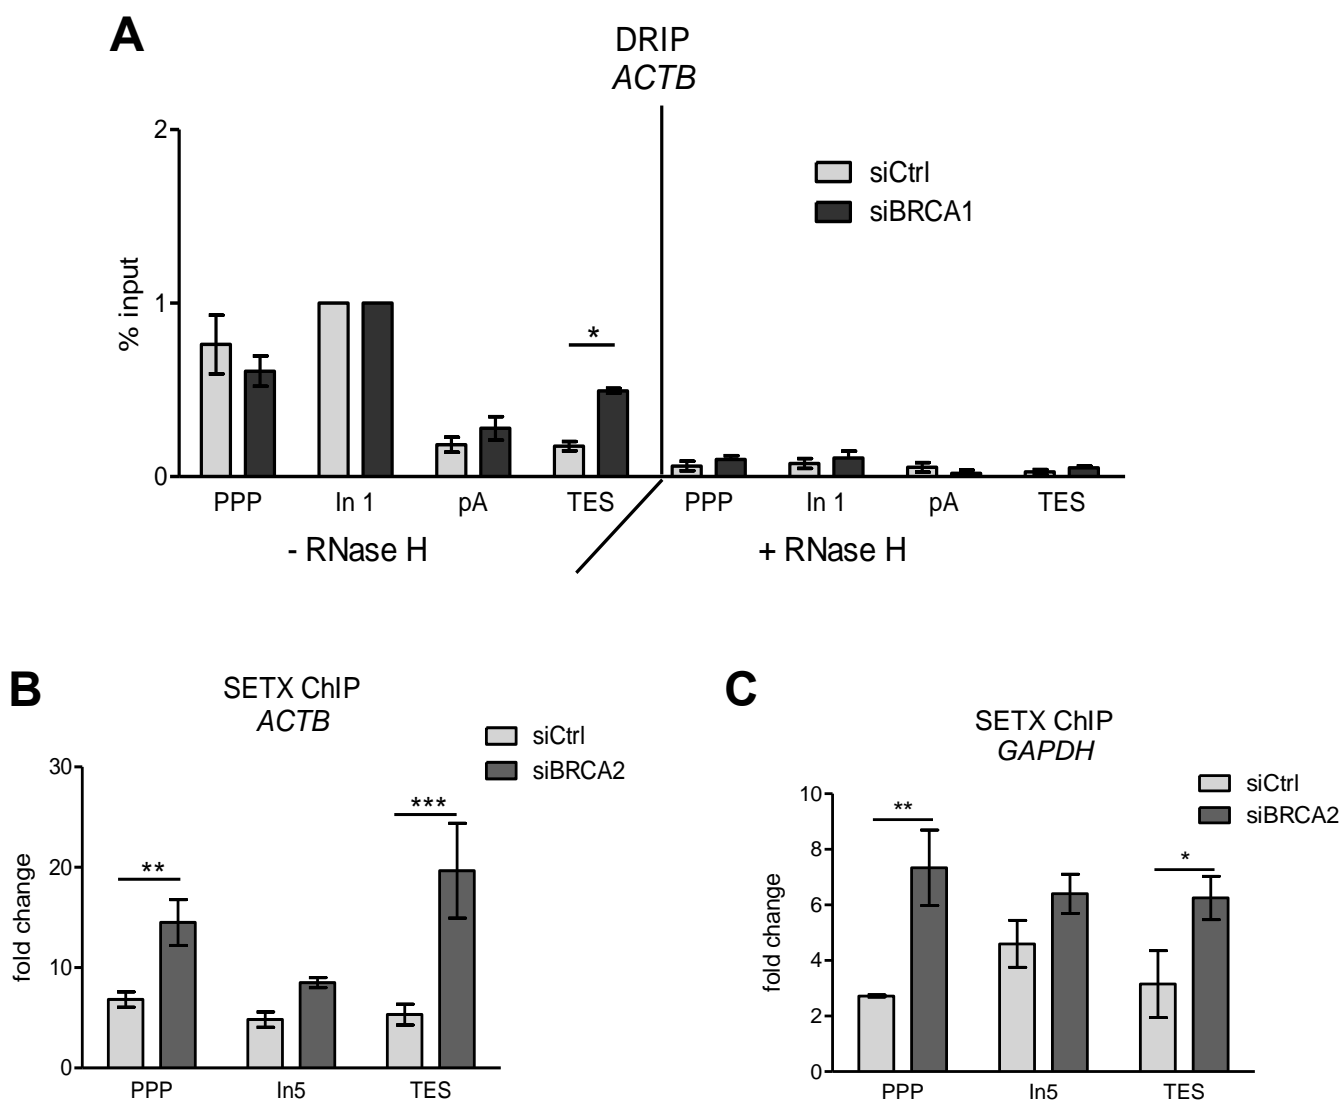

**Figure S2. Related to Figure 2.**

(A) DRIP analysis with S9.6 antibody of *ACTB* gene in HeLa Kyoto cells transfected with indicated siCtrl or siBRCA1 for 72h. R-loop dissolution by RNase H enzyme is shown as a control. Error bars indicate the mean $\pm$ s.e.m from three independent experiments. The 2-way ANOVA test was performed for all pairwise comparisons to determine statistical significance. Statistically significant differences are indicated. Data are normalized to In1. (B) ChIP analysis with SETX antibody of *ACTB* gene, and (C) *GAPDH* gene in HeLa Kyoto cells transfected with siCtrl or siBRCA2 for 72h. Error bars indicate the mean $\pm$ s.e.m of three independent experiments. The 2-way ANOVA test was performed for all pairwise comparisons to determine statistical significance. Statistically significant differences are indicated \* $p$ <0.05, \*\* $p$ <0.01, \*\*\* $p$ <0.001.

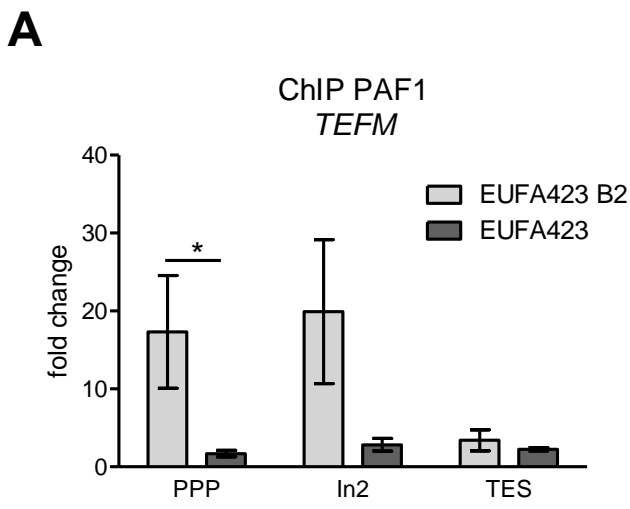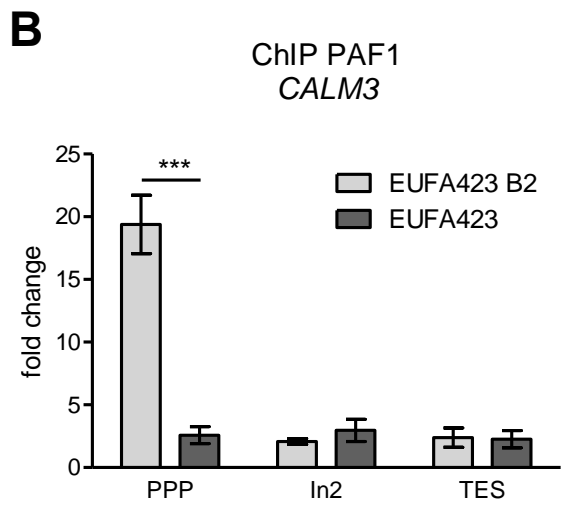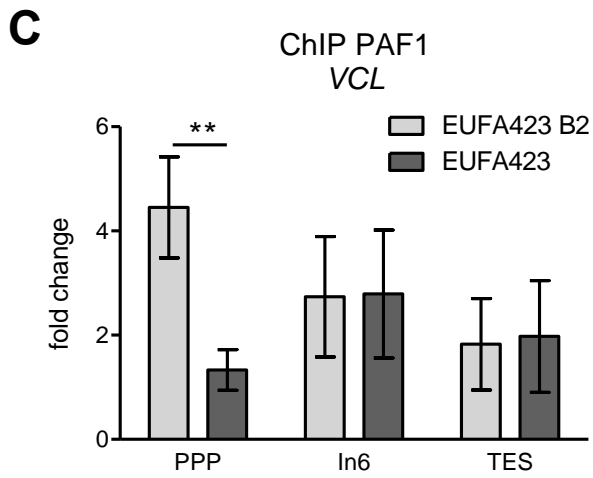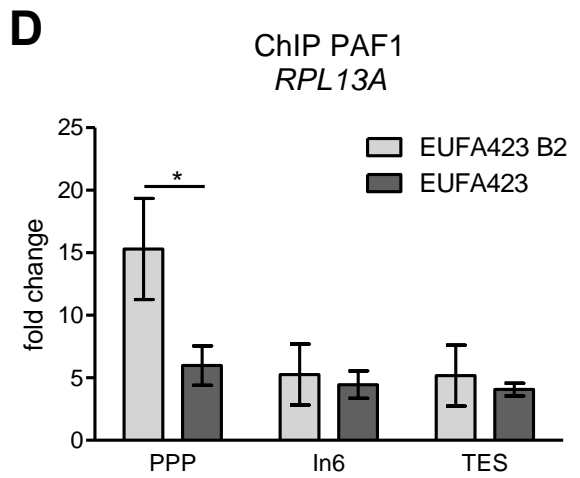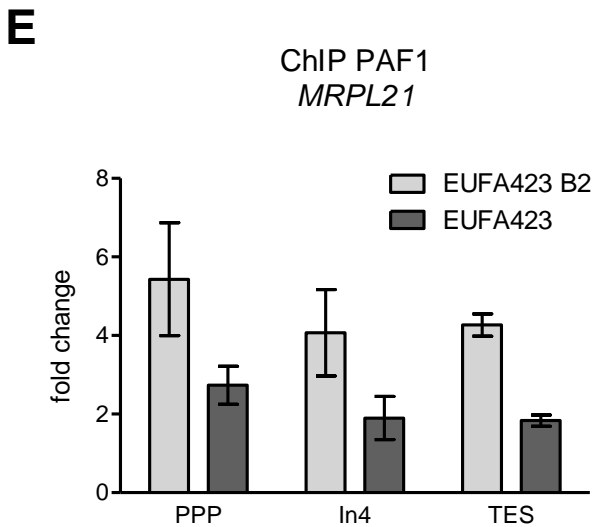

**Figure S3. Related to Figure 5.**

ChIP analyses of (A) *TEFM*, (B) *CALM3*, (C) *VCL*, (D) *RPL13A* and (E) *MRPL21* genes with PAF1 antibody in EUFA423 B2 and EUFA423 cells. The 2-way ANOVA test was performed for all pairwise comparisons to determine statistical significance. Statistically significant differences are indicated \* $p < 0.05$ , \*\* $p < 0.01$ , \*\*\* $p < 0.001$ .

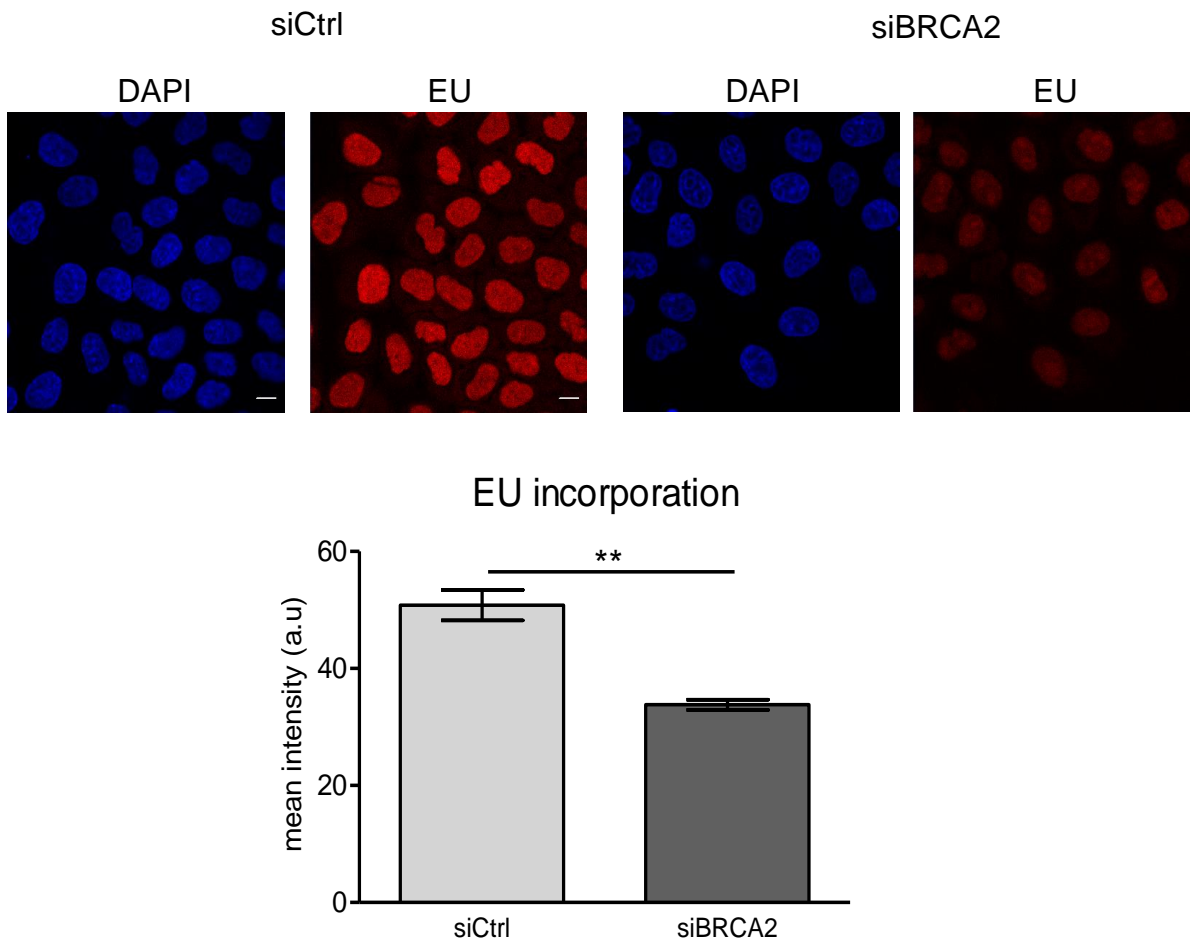

**Figure S4. Related to Figure 5.**

Immunofluorescence of siCtrl or siBRCA2 transfected HeLa Kyoto cells labelled with the nucleotide analogue 5-Ethynyl Uridine (EU) for 30 minutes to capture nascent RNA synthesis. Scale bars 10 $\mu$ m. The decrease in EU incorporation was quantitated in three independent experiments, and plotted in the bar graph as mean $\pm$ s.e.m. The two-tailed Student's t-test was performed to determine statistical significance between the two groups. \*\* indicates p<0.01.

**Supplemental Table S1. Related to Figures 1-6. Antibodies used in this study.**

| <b>Antibody name</b>                     | <b>Clone No:</b> | <b>Cat. No:</b> | <b>Supplier</b>   | <b>Stock Conc mg/ml</b> | <b>Application</b> | <b>Host</b> | <b>Clonality</b> |
|------------------------------------------|------------------|-----------------|-------------------|-------------------------|--------------------|-------------|------------------|
| BRCA2                                    | Ab-1             | OP95            | Merck             |                         | WB/IP/ChIP         | Mouse       | mAb              |
| H2B K120 Ubiquitin                       | D11              | 5546S           | Cell Signalling   |                         | WB/ChIP            | Mouse       | mAb              |
| H2B                                      |                  | Ab1790          | Abcam             |                         | WB                 | Rabbit      | pAb              |
| γH2AX (phospho S139)                     |                  | Ab2893          | Abcam             |                         | ChIP               | Rabbit      | pAb              |
| PAF1                                     |                  | Ab137519        | Abcam             |                         | WB                 | Rabbit      | pAb              |
| PAF1                                     |                  | A300-173A       | Bethyl            | 1ug/uL                  | ChIP               | Rabbit      | pAb              |
| RNA polymerase II                        | MABI0601         | MABI0601        | MBL ltl           | 1ug/uL                  | ChIP               | Mouse       | mAb              |
| RNA polymerase II<br><b>DISCONTINUED</b> | N20              | SC-899          | Santa Cruz        |                         | WB/IP/ChIP         | Rabbit      | pAb              |
| RNA polymerase II(Ser5P)                 | 3E8              | 04-1572         | Millipore         | 1ug/uL                  | WB/ChIP            | Rat         | pAb              |
| RNA polymerase II(Ser2P)                 | 3E10             | 04-1571         | Millipore         | 1ug/uL                  | WB                 | Rat         | pAb              |
| S9.6                                     |                  |                 | In-house purified | 0.84ug/ml               | IF (1:100)<br>IP   | Mouse       | mAb              |
| SETX                                     | QQ7              | SC-100319       | Santa Cruz        |                         | WB/IP/ChIP         | Mouse       | mAb              |
| SETX                                     |                  | NB100-57542     | Novus             | 1 µg/µl                 | WB (1:4000)        | Rabbit      | mAb              |

**Supplemental Table S2. Related to Figures 1-6. Primers used in this study.**

|            | <b>Forward</b>            | <b>Reverse</b>            |
|------------|---------------------------|---------------------------|
| ACTB_PPP   | GAGGGGAGAGGGGGTAAA        | AGCCATAAAAGGCAACTTTTCG    |
| ACTB_In1   | CGGGGTCTTTGTCTGAGC        | CAGTTAGCGCCCAAAGGAC       |
| ACTB_In5   | GGAGCTGTCACATCCAGGGTC     | TGCTGATCCACATCTGCTGG      |
| ACTB_pA    | TTACCCAGAGTGCAGGTGTG      | CCCCAATAAGCAGGAACAGA      |
| ACTB_TES   | GGGACTATTTGGGGGTGTCT      | TCCCATAGGTGAAGGCAAAG      |
| GAPDH_PPP  | CTCCTGTTTCGACAGTCAGC      | TTCAGGCCGTCCCTAGC         |
| GAPDH_In5  | ATAGGCGAGATCCCTCCAA       | TGAAGACGCCAGTGGAC         |
| GAPDH_TES  | CCCTGTGCTCAACCAGT         | CTCACCTTGACACAAGCC        |
| TEFM_PPP   | CTTGAGATGAGCGGGTCTG       | GACAGACGGGAAATCACCCC      |
| TEFM_In2   | TGGCCAATGTGGTGAAAGCC      | GGGACTACAGGCCACGCC        |
| TEFM_TES   | ACCACATAGACTTTATGACAGAGAA | TCAATCCATGCTTGTGAAGCAAA   |
| CALM3_PPP  | TGCGGGCAGTGAGTGTGGAGG     | ACGGGGATCAAGTTTCTCCGG     |
| CALM3_In1  | GTTTCGGGCCCTATTGCGCAC     | AAAAGCTGGCTCATTCGAGGCACC  |
| CALM3_TES  | CGGATGCCCGTTCTCTTGATC     | CGCAGGGGAGTGTGAAGAGAGA    |
| MRPL21_PPP | CGTTACGCACGCGGTTC         | GACCGTCAGGGAAGATGCTG      |
| MRPL21_In4 | CGGCATTGAGAATGGTTGCC      | GCAATGATTGAGGCTCTCCT      |
| MRPL21_TES | ACCAGGTTTCTGTGTTCTGGT     | GGCCTGGTGCTTACAGACAT      |
| RPL13A_PPP | ATGGCGGAGGTGCAGGTATG      | AGAGAGGGTGCGACCCATT       |
| RPL13A_In6 | AGATTTTCAGGCCTGCTGAGG     | CCGCAGACCATCGTGAGATA      |
| RPL13A_TES | TGGCGTCTTTGCACTGTGTC      | CTACCCTCTTCAAGCTCCTCAC    |
| VCL_PPP    | GTGAGGCTGGTTACGCCGAG      | CGGGAACCGGCCGAAGAGA       |
| VCL_In6    | CTCTGGTATCTGAATCTGCTTTCT  | AGCAGTATTTGCAATGTTTGGTTT  |
| VCL_TES    | AGAACTTTTAGGTCAGGTTTCTCCT | GTTTCCAGATCTTGAGGATTAGTTT |

**Supplemental Table S3. Related to Figures 1-3, 5-6, S2-S4. Statistical analysis.**

| <b>Figure 1</b>       |            | P value    |        | summary   |         |
|-----------------------|------------|------------|--------|-----------|---------|
| <b>A</b>              | t-test     | two-tailed | 0.0061 | **        |         |
| <b>B</b>              | t-test     | two-tailed | 0.0087 | **        |         |
| <b>C left</b>         |            |            |        |           |         |
| EUFA423 B2 vs EUFA423 | Row Factor | Difference | t      | P value   | Summary |
| 2-way ANOVA           | PPP        | 0.62       | 3.918  | P < 0.01  | **      |
| 2-way ANOVA           | In1        | 0.18       | 1.137  | P > 0.05  | ns      |
| 2-way ANOVA           | pA         | -0.125     | 0.645  | P > 0.05  | ns      |
| 2-way ANOVA           | TES        | 0.06       | 0.3792 | P > 0.05  | ns      |
| <b>D left</b>         |            |            |        |           |         |
| EUFA423 B2 vs EUFA423 | Row Factor | Difference | t      | P value   | Summary |
| 2-way ANOVA           | PPP        | 2.3        | 2.802  | P < 0.05  | *       |
| 2-way ANOVA           | In5        | 0.4833     | 0.5889 | P > 0.05  | ns      |
| 2-way ANOVA           | TES        | 0.33       | 0.4021 | P > 0.05  | ns      |
| <b>E left</b>         |            |            |        |           |         |
| EUFA423 B2 vs EUFA423 | Row Factor | Difference | t      | P value   | Summary |
| 2-way ANOVA           | PPP        | 1.06       | 0.8644 | P > 0.05  | *       |
| 2-way ANOVA           | In2        | 0.16       | 0.1305 | P > 0.05  | ns      |
| 2-way ANOVA           | TES        | 3.333      | 2.718  | P > 0.05  | ns      |
| <b>C right</b>        |            |            |        |           |         |
| siCtrl vs siBRCA2     | Row Factor | Difference | t      | P value   | Summary |
| 2-way ANOVA           | PPP        | 11.67      | 3.198  | P < 0.05  | *       |
| 2-way ANOVA           | In1        | -1         | 0.2741 | P > 0.05  | ns      |
| 2-way ANOVA           | pA         | 1.667      | 0.4569 | P > 0.05  | ns      |
| 2-way ANOVA           | TES        | 2.667      | 0.7311 | P > 0.05  | ns      |
| <b>D right</b>        |            |            |        |           |         |
| siCtrl vs siBRCA2     | Row Factor | Difference | t      | P value   | Summary |
| 2-way ANOVA           | PPP        | 5.767      | 5.449  | P < 0.001 | ***     |
| 2-way ANOVA           | In5        | 0.03333    | 0.0315 | P > 0.05  | ns      |
| 2-way ANOVA           | TES        | 0.6        | 0.5669 | P > 0.05  | ns      |
| <b>E right</b>        |            |            |        |           |         |
| siCtrl vs siBRCA2     | Row Factor | Difference | t      | P value   | Summary |
| 2-way ANOVA           | PPP        | 30.71      | 3.878  | P < 0.01  | **      |
| 2-way ANOVA           | In2        | 9.39       | 1.186  | P > 0.05  | ns      |
| 2-way ANOVA           | TES        | 2.733      | 0.3451 | P > 0.05  | ns      |

| <b>Figure 2</b>          |            |            |        |           |         |
|--------------------------|------------|------------|--------|-----------|---------|
| <b>A</b>                 |            |            |        |           |         |
| EUFA423 B2 vs EUFA423    | Row Factor | Difference | t      | P value   | Summary |
| 2-way ANOVA              | PPP        | 0.835      | 4.796  | P < 0.01  | **      |
| 2-way ANOVA              | In4        | -0.05      | 0.2872 | P > 0.05  | ns      |
| 2-way ANOVA              | TES        | -0.375     | 2.154  | P > 0.05  | ns      |
| <b>B</b>                 |            |            |        |           |         |
| EUFA423 B2 vs EUFA423    | Row Factor | Difference | t      | P value   | Summary |
| 2-way ANOVA              | PPP        | 7.668      | 3.998  | P < 0.01  | **      |
| 2-way ANOVA              | In2        | -0.335     | 0.1747 | P > 0.05  | ns      |
| <b>C</b>                 |            |            |        |           |         |
| EUFA423 B2 vs EUFA423    | Row Factor | Difference | t      | P value   | Summary |
| 2-way ANOVA              | PPP        | 0.51       | 3.964  | P < 0.01  | **      |
| 2-way ANOVA              | In6        | -0.05667   | 0.4404 | P > 0.05  | ns      |
| 2-way ANOVA              | TES        | 0.09667    | 0.7513 | P > 0.05  | ns      |
| <b>D</b>                 |            |            |        |           |         |
| EUFA423 B2 vs EUFA423    | Row Factor | Difference | t      | P value   | Summary |
| 2-way ANOVA              | PPP        | 4.765      | 5.337  | P < 0.01  | **      |
| 2-way ANOVA              | In6        | 1.81       | 2.027  | P > 0.05  | ns      |
| 2-way ANOVA              | TES        | 0.39       | 0.4368 | P > 0.05  | ns      |
| <b>E</b>                 |            |            |        |           |         |
| EUFA423 B2 vs EUFA423    | Row Factor | Difference | t      | P value   | Summary |
| 2-way ANOVA              | PPP        | 1.368      | 4.925  | P < 0.01  | **      |
| 2-way ANOVA              | In5        | 0.7926     | 2.853  | P < 0.05  | *       |
| 2-way ANOVA              | TES        | 0.7592     | 2.733  | P > 0.05  | ns      |
| <b>F</b>                 |            |            |        |           |         |
| EUFA423 vs EUFA423/ERRC4 | Row Factor | Difference | t      | P value   | Summary |
| 2-way ANOVA              | PPP        | -2.123     | 7.335  | P < 0.001 | ***     |
| 2-way ANOVA              | In5        | -1.493     | 5.158  | P < 0.001 | ***     |
| 2-way ANOVA              | TES        | -1.228     | 4.241  | P < 0.01  | **      |

| <b>Figure 3</b>       |            |            |        |          |         |
|-----------------------|------------|------------|--------|----------|---------|
| <b>A left</b>         |            |            |        |          |         |
| EUFA423 B2 vs EUFA423 | Row Factor | difference | t      | P value  | summary |
| 2-way ANOVA           | PPP        | 184.3      | 3.396  | P < 0.05 | *       |
| 2-way ANOVA           | In5        | 2          | 0.0369 | P > 0.05 | ns      |
| 2-way ANOVA           | TES        | 62.33      | 1.148  | P > 0.05 | ns      |
| <b>B left</b>         |            |            |        |          |         |
| EUFA423 B2 vs EUFA423 | Row Factor | Difference | t      | P value  | Summary |
| 2-way ANOVA           | PPP        | -0.1767    | 1.791  | P > 0.05 | ns      |
| 2-way ANOVA           | In5        | -0.1333    | 1.352  | P > 0.05 | ns      |
| 2-way ANOVA           | TES        | 0.04333    | 0.4394 | P > 0.05 | ns      |
| <b>A right</b>        |            |            |        |          |         |
| EUFA423 B2 vs EUFA423 | Row Factor | Difference | t      | P value  | Summary |
| 2-way ANOVA           | PPP        | 37.67      | 3.067  | P < 0.05 | *       |
| 2-way ANOVA           | In5        | 2.5        | 0.1662 | P > 0.05 | ns      |
| 2-way ANOVA           | TES        | 0.3333     | 0.0272 | P > 0.05 | ns      |
| <b>B right</b>        |            |            |        |          |         |
| EUFA423 B2 vs EUFA423 | Row Factor | Difference | t      | P value  | Summary |
| 2-way ANOVA           | PPP        | -0.028     | 0.4378 | P > 0.05 | ns      |
| 2-way ANOVA           | In5        | -0.099     | 1.548  | P > 0.05 | ns      |
| 2-way ANOVA           | TES        | -0.09      | 1.407  | P > 0.05 | ns      |

| <b>Figure 5</b>       |            |            |       |           |         |
|-----------------------|------------|------------|-------|-----------|---------|
| <b>A left</b>         |            |            |       |           |         |
| siCtrl vs siBRCA2     | Row Factor | difference | t     | p-value   | summary |
| 2-way ANOVA           | PPP        | -31.06     | 4.395 | P < 0.01  | **      |
| 2-way ANOVA           | In5        | -11.46     | 1.622 | P > 0.05  | ns      |
| 2-way ANOVA           | TES        | -14.94     | 2.114 | P > 0.05  | ns      |
| <b>B left</b>         |            |            |       |           |         |
| EUFA423 B2 vs EUFA423 | Row Factor | difference | t     | p-value   | summary |
| 2-way ANOVA           | PPP        | 11.67      | 3.198 | P < 0.05  | *       |
| 2-way ANOVA           | In5        | -14.55     | 2.143 | P > 0.05  | ns      |
| 2-way ANOVA           | TES        | -13.29     | 1.958 | P > 0.05  | ns      |
| <b>C</b>              |            |            |       |           |         |
| siCtrl vs siBRCA2     | Row Factor | difference | t     | p-value   | summary |
| 2-way ANOVA           | PPP        | 0          | 0     | P > 0.05  | ns      |
| 2-way ANOVA           | In5        | -0.5025    | 6.185 | P < 0.001 | ***     |
| 2-way ANOVA           | TES        | -0.4417    | 5.436 | P < 0.001 | ***     |
| <b>A right</b>        |            |            |       |           |         |
| siCtrl vs siBRCA2     | Row Factor | difference | t     | p-value   | summary |
| 2-way ANOVA           | PPP        | -3.75      | 1.594 | P > 0.05  | ns      |
| 2-way ANOVA           | In5        | -14.5      | 6.163 | P < 0.01  | **      |
| 2-way ANOVA           | TES        | -10.15     | 4.314 | P < 0.05  | *       |
| <b>B right</b>        |            |            |       |           |         |
| EUFA423 B2 vs EUFA423 | Row Factor | difference | t     | p-value   | summary |
| 2-way ANOVA           | PPP        | -26.37     | 4.626 | P < 0.01  | **      |
| 2-way ANOVA           | In5        | -27.3      | 4.79  | P < 0.01  | **      |
| 2-way ANOVA           | TES        | -40.43     | 7.095 | P < 0.001 | ***     |
| <b>D</b>              |            |            |       |           |         |
| EUFA423 B2 vs EUFA423 | Row Factor | difference | t     | p-value   | summary |
| 2-way ANOVA           | PPP        | 0          | 0     | P > 0.05  | ns      |
| 2-way ANOVA           | In5        | -0.7236    | 3.049 | P < 0.05  | *       |
| 2-way ANOVA           | TES        | -0.7155    | 3.015 | P < 0.05  | *       |

| <b>Figure 6</b>              |            |            |        |          |         |
|------------------------------|------------|------------|--------|----------|---------|
| <b>A</b>                     |            |            |        |          |         |
| siCtrl vs siBRCA2            | Row Factor | Difference | t      | P value  | Summary |
| 2-way ANOVA                  | PPP        | 6.888      | 1.707  | P < 0.05 | *       |
| 2-way ANOVA                  | In5        | 1.533      | 0.4103 | P > 0.05 | ns      |
| 2-way ANOVA                  | TES        | 1.095      | 0.2931 | P > 0.05 | ns      |
| siCtrl vs siPAF1             | Row Factor | Difference | t      | P value  | Summary |
| 2-way ANOVA                  | PPP        | 12.06      | 3.229  | P < 0.01 | **      |
| 2-way ANOVA                  | In5        | 5.233      | 1.401  | P > 0.05 | ns      |
| 2-way ANOVA                  | TES        | 4.67       | 1.25   | P > 0.05 | ns      |
| siCtrl vs siBRCA2/siPAF1     | Row Factor | Difference | t      | P value  | Summary |
| 2-way ANOVA                  | PPP        | 11.09      | 2.748  | P < 0.05 | *       |
| 2-way ANOVA                  | In5        | 2.333      | 0.5781 | P > 0.05 | ns      |
| 2-way ANOVA                  | TES        | 1.812      | 0.449  | P > 0.05 | ns      |
| <b>C</b>                     |            |            |        |          |         |
| EUFA423 B2 vs EUFA423        | Row Factor | Difference | t      | P value  | Summary |
| 2-way ANOVA                  | PPP        | 3.015      | 3.78   | P < 0.05 | *       |
| 2-way ANOVA                  | In5        | -0.15      | 0.1881 | P > 0.05 | ns      |
| 2-way ANOVA                  | TES        | -0.4       | 0.5015 | P > 0.05 | ns      |
| EUFA423 B2 vs EUFA423 + PAF1 | Row Factor | Difference | t      | P value  | Summary |
| 2-way ANOVA                  | PPP        | -0.09      | 0.1128 | P > 0.05 | ns      |
| 2-way ANOVA                  | In5        | -0.885     | 1.11   | P > 0.05 | ns      |
| 2-way ANOVA                  | TES        | -1.38      | 1.73   | P > 0.05 | ns      |



**Supplemental Figure 2**

| <b>A</b>          |            |            |        |          |         |
|-------------------|------------|------------|--------|----------|---------|
| siCtrl vs siBRCA1 | Row Factor | Difference | t      | P value  | Summary |
| 2-way ANOVA       | PPP        | -0.1537    | 1.474  | P > 0.05 | ns      |
| 2-way ANOVA       | In 1       | 0          | 0      | P > 0.05 | ns      |
| 2-way ANOVA       | pA         | 0.09445    | 0.9058 | P > 0.05 | ns      |
| 2-way ANOVA       | TES        | 0.319      | 3.06   | P < 0.05 | *       |
| <b>B</b>          |            |            |        |          |         |
| siCtrl vs siBRCA2 | Row Factor | Difference | t      | P value  | Summary |
| 2-way ANOVA       | PPP        | 4.615      | 4.999  | P < 0.01 | **      |
| 2-way ANOVA       | In5        | 1.8        | 1.95   | P > 0.05 | ns      |
| 2-way ANOVA       | TES        | 3.1        | 3.358  | P < 0.05 | ***     |
| <b>C</b>          |            |            |        |          |         |
| siCtrl vs siBRCA2 | Row Factor | Difference | t      | P value  | Summary |
| 2-way ANOVA       | PPP        | 7.667      | 4.193  | P < 0.01 | **      |
| 2-way ANOVA       | In5        | 3.667      | 2.006  | P > 0.05 | ns      |
| 2-way ANOVA       | TES        | 14.33      | 7.84   | P < 0.05 | *       |

**Supplemental Figure 3**

| <b>A</b>              |            |            |        |          | <b>B</b> |                       |            |            |        |           |         |
|-----------------------|------------|------------|--------|----------|----------|-----------------------|------------|------------|--------|-----------|---------|
| EUFA423 B2 vs EUFA423 | Row Factor | Difference | t      | P value  | Summary  | EUFA423 B2 vs EUFA423 | Row Factor | Difference | t      | P value   | Summary |
| 2-way ANOVA           | PPP        | -15.64     | 2.84   | P < 0.05 | *        | 2-way ANOVA           | PPP        | -16.81     | 10.4   | P < 0.001 | ***     |
| 2-way ANOVA           | In2        | -17.09     | 2.776  | P > 0.05 | ns       | 2-way ANOVA           | In2        | 0.8933     | 0.5528 | P > 0.05  | ns      |
| 2-way ANOVA           | TES        | -1.16      | 0.2107 | P > 0.05 | ns       | 2-way ANOVA           | TES        | -0.1267    | 0.0784 | P > 0.05  | ns      |
| <b>C</b>              |            |            |        |          | <b>D</b> |                       |            |            |        |           |         |
| EUFA423 B2 vs EUFA423 | Row Factor | Difference | t      | P value  | Summary  | EUFA423 B2 vs EUFA423 | Row Factor | Difference | t      | P value   | Summary |
| 2-way ANOVA           | PPP        | -3.123     | 3.874  | P < 0.01 | **       | 2-way ANOVA           | PPP        | -9.317     | 2.844  | P < 0.05  | *       |
| 2-way ANOVA           | In6        | 0.05333    | 0.0662 | P > 0.05 | ns       | 2-way ANOVA           | In6        | -0.81      | 0.2473 | P > 0.05  | ns      |
| 2-way ANOVA           | TES        | 0.15       | 0.186  | P > 0.05 | ns       | 2-way ANOVA           | TES        | -1.113     | 0.3399 | P > 0.05  | ns      |

**Supplemental Figure 4**

|                 |        |
|-----------------|--------|
| Unpaired t test |        |
| P value         | 0.0035 |
| P value summary | **     |
